# Supplementary material for: Recent changes in pan-Antarctic region surface snowmelt detected by AMSR-E and AMSR2
Source: Copernicus journal article supplement (doi:10.5194/tc-14-3811-2020), 2020-11-09
Supplement: Supplementary file 1 [file tc-14-3811-2020-supplement.pdf]

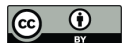

## *Supplement of*

# **Recent changes in pan-Antarctic region surface snowmelt detected by AMSR-E and AMSR2**

**Lei Zheng et al.**

*Correspondence to:* Chunxia Zhou (zhoucx@whu.edu.cn) and Tingjun Zhang (tjzhang@lzu.edu.cn)

The copyright of individual parts of the supplement might differ from the CC BY 4.0 License.

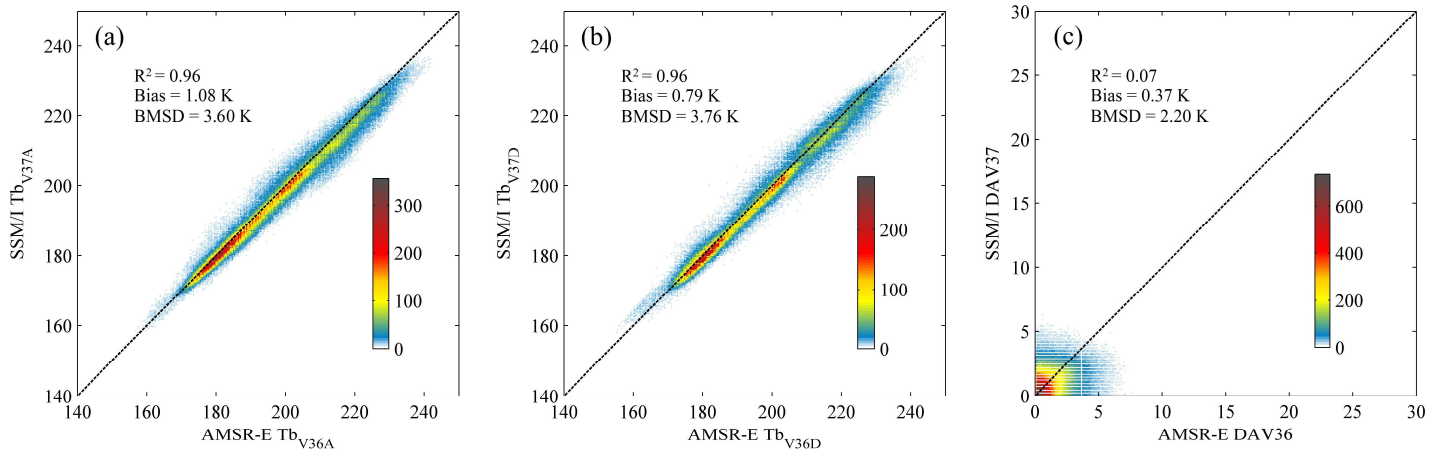

Figure 1. Comparison between AMSR-E vertically polarized 36.5 GHz Tb ( $Tb_{V36}$ ) and SSM/I vertically polarized 37 GHz Tb ( $Tb_{V37}$ ) during 2002-2003. (a), (b) and (c) show the comparisons for ascending passes, descending passes, and their differences. DAV37 and DAV36 denote diurnal amplitude variations (DAV) of vertically polarized SSM/I 37 GHz Tb and AMSR-E 36.5 GHz Tb, respectively.

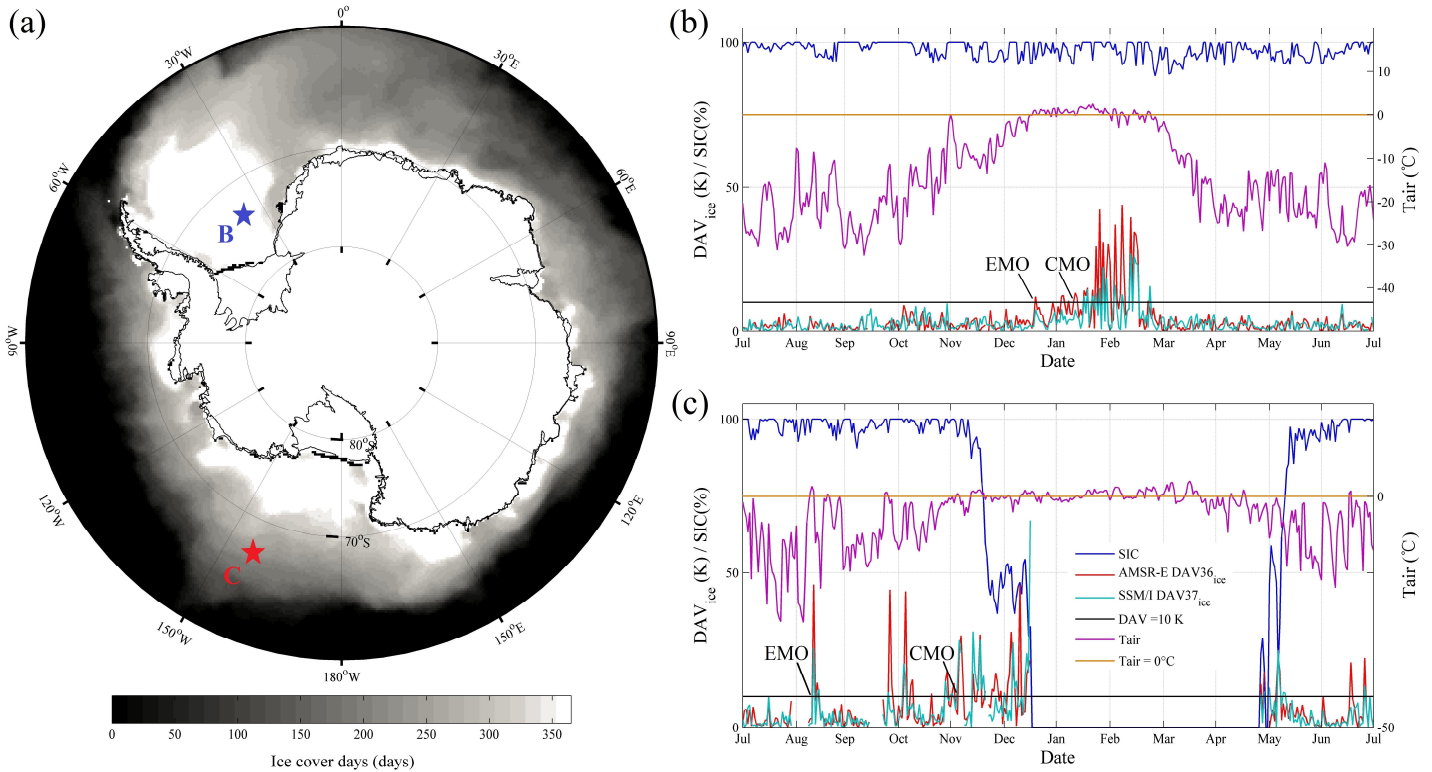

Figure 2. Surface snowmelt detection on the Antarctic sea ice. (a) Pan-Antarctic ice cover days in 2002-2003, Point B and C show the locations of the pixels examined in (b) and (c). (b) and (c) show the comparisons of sea ice concentration (SIC), ERA-Interim  $T_{air}$  and satellite observations for a multi-year sea ice pixel (Point B) and a first-year sea ice pixel (Point C).  $DAV_{37_{ice}}$  and  $DAV_{36_{ice}}$  denote diurnal amplitude variations (DAV) of vertically polarized SSM/I 37 GHz Tb and AMSR-E 36.5 GHz Tb contributed by the ice portion, respectively.
